# Supplementary material for: Consumer Preference Segments for Plant-Based Foods: The Role of Product Category
Source: MDPI journal article supplement (doi:10.3390/foods11193059), 2022-10-01
Supplement: s1 [file s1]

SUPPLEMENTARY MATERIAL

**PART S1.** Summary of participant characteristics by country with United States (US, n=629), Australia (AU, n=623), Singapore (SG, n=627), and India (IN, n=615).

|                                           | US     | AU     | SG     | IN     |
|-------------------------------------------|--------|--------|--------|--------|
| <b>Biological sex (%)</b>                 |        |        |        |        |
| Female                                    | 50.1   | 50.2   | 50.1   | 49.8   |
| Male                                      | 49.9   | 49.8   | 49.9   | 50.2   |
| <b>Age group (%)</b>                      |        |        |        |        |
| 18-45 y.o.                                | 49.6   | 49.4   | 49.4   | 49.6   |
| 46-69 y.o.                                | 50.4   | 50.6   | 50.6   | 50.4   |
| <b>Education (%)</b>                      |        |        |        |        |
| High school, vocational or short graduate | 45.6   | 49.1   | 39.7   | 12.4   |
| University education (bachelor or higher) | 53.9   | 49.9   | 60.3   | 87.6   |
| Prefer to not disclose                    | 0.5    | 0.0    | 0.0    | 0.0    |
| <b>Dietary preferences (%)</b>            |        |        |        |        |
| Flexitarian                               | 28.5   | 22.3   | 40.0   | 44.9   |
| Omnivore                                  | 68.4   | 75.4   | 57.6   | 36.9   |
| Vegetarian                                | 3.2    | 2.2    | 2.4    | 18.2   |
| <b>Food Neophobia [M (SD)]</b>            | 37.3   | 39.4   | 38.3   | 37.4   |
|                                           | (12.4) | (11.0) | (8.1)  | (8.2)  |
| <b>Food Technology Neophobia [M (SD)]</b> | 57.6   | 56.7   | 55.8   | 55.1   |
|                                           | (13.0) | (11.8) | (9.2)  | (11.8) |
| <b>Environmental concern [M (SD)]</b>     | 58.9   | 62.5   | 62.1   | 65.9   |
|                                           | (14.7) | (13.4) | (10.0) | (9.9)  |

**PART S2.** Full list of food stimuli and background text.

1. Milk – from 100% plant-based ingredients
2. Cheese – from 100% plant-based ingredients
3. Vegetables – packaged in a modified atmosphere to increase shelf-life
4. Vegetables – grown indoors in buildings located in cities (urban farming)
5. Fish – reared indoors in buildings where fish and vegetables are farmed together (aquaponics)
6. Fish – from cell cultures grown in a laboratory
7. Fish – from 100% plant-based ingredients
8. Meat – from cell cultures grown in a laboratory
9. Meat – from 100% plant-based ingredients
10. Meat – blend containing 33% plant-based ingredients
11. Meat – blend containing 10% insect powder
12. Bread – from wheat strain transformed by gene-editing to be high-yielding

Our current approaches to food production and our consumption levels are global problems because they drive climate change and environmental degradation. Animal farming is particularly damaging for the environment, and to reduce environmental impacts we must change the way we eat – increasing our consumption of plant foods while substantially limiting our intake from animal sources.

To support this transition, interest has centered on those plant foods that are good sources of proteins – soybeans, nuts, peas, and some grains – and can provide a nutritionally sound alternative to foods from animals, while also being suitable for the growing number of people who do not, or cannot, eat certain animal-sourced foods (e.g., vegetarians/vegans, people who have a dairy allergy or are lactose intolerant).

In the past decade, more and more of these 100% plant-based foods have become available in the United States / Australia / Singapore / India. Plant-based “milks” made from, for example, soy, almonds, oats, and even cashew nuts are fairly familiar now, and plant-based “yoghurt” and “cheese” are no longer uncommon. Plant-based “meat”, “fish”, and “seafood” are much more novel.

Besides replacing foods from animals with plant-based foods, or creating blends of animal-plant foods, there is also considerable interest in developing alternative sources of animal-derived proteins. These include insects – which are important in some traditional diets around the world – because they can be farmed at large scale with low environmental impact. In particular, “insect flour”, which can be used in many different types of foods, is being considered for more widespread consumption.

Laboratory-cultured meat/fish, produced from cultured animal cells, is a potential game-changer from an environmental point of view. There is still some way to go before this way of producing food can feed large numbers of people, but it may become the norm in future.

Alongside these different innovations, there is much interest in improving existing technologies used in food production. These include, for example, improved packaging materials for perishable foods such as fruits, vegetables and bread to improve their shelf-life and require less refrigeration. There are also ongoing efforts to improve crop yields and drought resistance, and these goals can be achieved using gene-editing technologies.

Because the world continues to urbanize, there are also many efforts to develop urban farming. This means producing food in cities rather than in rural districts, which means that transportation is no longer needed, to the benefit of the environment. The most well-known example of this is vertical

farming, where crops are grown indoors, stacked vertically in layers, removing land-use requirements almost entirely. Some vertical farming systems seek to further reduce environmental impacts of food production by recovering nutrients from one food system and using them in another, increasing both efficiency and sustainability. “Aquaponics” – a system where fish and vegetables are reared in the same indoor facility in a way that the nutrient-rich water from the fish rearing supports the plant growth – is one example.

**PART S3.** Items include in the scale to measure environmental concern. Reverse coded items are denoted with \*

| Environmental concern                                                                                                | Origin                              |
|----------------------------------------------------------------------------------------------------------------------|-------------------------------------|
| When humans interfere with nature it often produces disastrous consequences                                          | Item 3, Dunlap et al. [1]           |
| Humans are severely abusing the environment                                                                          | Item 5, Dunlap et al. [1]           |
| Despite our special abilities, humans are still subject to the laws of nature                                        | Item 9, Dunlap et al. [1]           |
| If things continue on their present course, we will soon experience a major ecological catastrophe                   | Item 15, Dunlap et al. [1]          |
| The news media have exaggerated the ecological problem*                                                              | Item 1, Lounsbury and Tornatzky [2] |
| If mankind is going to survive at all, environmental pollution must be stopped                                       | Item 2, Lounsbury and Tornatzky [2] |
| I am worried about future children's chance of living in a clean environment                                         | Item 4, Lounsbury and Tornatzky [2] |
| We shouldn't worry about environmental problems because science and technology will solve them before very long*     | Item 5, Lounsbury and Tornatzky [2] |
| It genuinely infuriates me to think that the government doesn't do more to help control pollution of the environment | Item 23, Maloney et al. [3]         |
| I become incensed when I think about the harm being done to plant and animal life by pollution                       | Item 25, Maloney et al. [3]         |
| When I think of the ways industries are polluting, I get frustrated and angry                                        | Item 28, Maloney et al. [3]         |
| The whole pollution issue has never upset me too much since I feel it's somewhat overrated*                          | Item 29, Maloney et al. [3]         |

•

## **PART S4. Data quality statement.**

### United States

The final sample of 629 people was reached by approaching a total of 2143 people, of which 469 did not satisfy the eligibility criteria, and 360 began but did not complete the survey. *Post-hoc*, 16 people who had completed the survey were excluded because they had completed the survey very quickly (operationalised as faster than 1/3 of the median response time), which is linked to careless responding [4]. A total of 37 people who completed the survey and passed the “speeder criterion” were also removed *post-hoc* because they provided the same score (i.e., flatlining) [5] for all statements in the 10-item food neophobia scale [6] as well as the 13-item food technology neophobia scale [6]. A further 8 people were removed because they provided random or nonsensical verbatim responses. Of the 1253 qualified participants, 624 people completed other questions that are not related to the present research. The median time to complete the required tasks was 12.0 (IQR=9.3) min.

### Australia

The final sample of 623 people was reached by approaching a total of 815 people, of which 122 did not satisfy the eligibility criteria, and 43 began but did not complete the survey. *Post-hoc*, 11 people who had completed the survey were excluded because they had completed the survey very quickly (operationalised as faster than 1/3 of the median response time), which is linked to careless responding [4]. A total of 16 people who completed the survey and passed the “speeder criterion” were also removed *post-hoc* because they provided the same score (i.e., flatlining) [5] for all statements in the 10-item food neophobia scale [6] as well as the 13-item food technology neophobia scale [7]. The median time to complete the required tasks was 12.5 (IQR=8.8) min.

### Singapore

The final sample of 627 people was reached by approaching a total of 810 people, of which 109 did not satisfy the eligibility criteria, and 26 began but did not complete the survey. *Post-hoc*, 22 people who had completed the survey were excluded because they had completed the survey very quickly (operationalised as faster than 1/3 of the median response time), which is linked to careless responding [4]. A total of 26 people who completed the survey and passed the “speeder criterion” were also removed *post-hoc* because they provided the same score (i.e., flatlining) [5] for all statements in the 10-item food neophobia scale [6] as well as the 13-item food technology neophobia scale [7]. The median time to complete the required tasks was 12.8 (IQR=11.0) min.

### India

The final sample of 615 people was reached by approaching a total of 1004 people, of which 313 did not satisfy the eligibility criteria, and 45 began but did not complete the survey. *Post-hoc*, 19 people who had completed the survey were excluded because they had completed the survey very quickly (operationalised as faster than 1/3 of the median response time), which is linked to careless responding [4]. A total of 11 people who completed the survey and passed the “speeder criterion” were also removed *post-hoc* because they provided the same score (i.e., flatlining) [5] for all statements in the 10-item food neophobia scale [6] as well as the 13-item food technology neophobia scale [7]. A further 1 person was removed because they provided random or nonsensical verbatim responses. The median time to complete the required tasks was 15.5 (IQR=11.4) min.

**PART S5.** Willingness to consume (WTC) ratings for the five plant-based (PB) food categories included in the study based on the aggregate sample of 2494 consumers across the USA, Australia, Singapore and India. WTC was rated on a 9-pt scale (1='Never or less than once yearly', 5 = '1-3 times per month', 9 = 'Once daily or more').

| Category    | Mean (SD) | Mean of ranks | Median (IQR) |
|-------------|-----------|---------------|--------------|
| PB Milk     | 4.4 (2.9) | 7105.5 (A)    | 4 (6)        |
| PB Cheese   | 3.8 (2.6) | 6418.4 (B)    | 3 (5)        |
| PB Meat     | 3.5 (2.5) | 6039.6 (C)    | 3 (5)        |
| PB Meat 33% | 3.4 (2.5) | 5983.7 (C)    | 3 (4)        |
| PB Fish     | 3.2 (2.5) | 5630.3 (D)    | 3 (4)        |

**PART S6.** Citation frequency (%) for emotional, conceptual and situational use CATA terms (aggregate sample). Results from Cochran Q test (final column) and post-hoc comparisons (Sheskin) for the five plant-based products in the study.

**S6A. Emotional and conceptual terms.**

| <b>Terms</b>  | <b>PB<br/>Cheese</b> | <b>PB<br/>Fish</b> | <b>PB<br/>Meat</b> | <b>PB<br/>Meat 33%</b> | <b>PB<br/>Milk</b> | <b>p-values</b> |
|---------------|----------------------|--------------------|--------------------|------------------------|--------------------|-----------------|
| Uninspired    | 12.7<br>(abc)        | 14.6<br>(c)        | 13.7<br>(bc)       | 12.2<br>(ab)           | 10.8<br>(a)        | <0.0001         |
| Enthusiastic  | 17.6<br>(b)          | 13.9<br>(a)        | 15.7<br>(ab)       | 14.8<br>(a)            | 14.2<br>(a)        | 0.000           |
| Nervous       | 7.9<br>(ab)          | 11.8<br>(d)        | 10.1<br>(cd)       | 9.4<br>(bc)            | 6.5<br>(a)         | <0.0001         |
| Passive       | 7.5<br>(a)           | 7.5<br>(a)         | 8.1<br>(a)         | 8.7<br>(a)             | 8.6<br>(a)         | 0.208           |
| Tense         | 4.9<br>(ab)          | 6.4<br>(bc)        | 6.7<br>(c)         | 6.0<br>(bc)            | 4.2<br>(a)         | <0.0001         |
| Dissatisfied  | 14.6<br>(a)          | 18.8<br>(c)        | 16.9<br>(bc)       | 14.8<br>(ab)           | 13.6<br>(a)        | <0.0001         |
| Adventurous   | 17.1<br>(ab)         | 16.8<br>(ab)       | 17.4<br>(ab)       | 18.2<br>(b)            | 15.3<br>(a)        | 0.032           |
| Boring        | 8.6<br>(ab)          | 8.7<br>(ab)        | 10.0<br>(b)        | 8.0<br>(a)             | 7.9<br>(a)         | 0.013           |
| Classy        | 11.8<br>(c)          | 8.5<br>(ab)        | 8.9<br>(ab)        | 7.3<br>(a)             | 10.0<br>(bc)       | <0.0001         |
| Comforting    | 12.9<br>(b)          | 8.6<br>(a)         | 11.2<br>(b)        | 11.1<br>(b)            | 20.6<br>(c)        | <0.0001         |
| Easygoing     | 13.4<br>(bc)         | 11.3<br>(ab)       | 12.8<br>(abc)      | 10.7<br>(a)            | 14.8<br>(c)        | <0.0001         |
| Energetic     | 4.5<br>(a)           | 4.9<br>(a)         | 4.9<br>(a)         | 4.3<br>(a)             | 16.8<br>(b)        | <0.0001         |
| Feminine      | 16.4<br>(d)          | 12.8<br>(bc)       | 14.4<br>(cd)       | 12.1<br>(b)            | 4.4<br>(a)         | <0.0001         |
| Happy         | 20.8<br>(b)          | 17.9<br>(a)        | 20.6<br>(b)        | 19.4<br>(ab)           | 23.5<br>(c)        | <0.0001         |
| Inspiring     | 15.2<br>(a)          | 13.2<br>(a)        | 15.4<br>(a)        | 14.1<br>(a)            | 21.5<br>(b)        | <0.0001         |
| Powerful      | 8.1<br>(a)           | 9.9<br>(a)         | 9.9<br>(a)         | 8.9<br>(a)             | 16.1<br>(b)        | <0.0001         |
| Pretentious   | 11.5<br>(b)          | 10.7<br>(b)        | 10.5<br>(b)        | 9.9<br>(b)             | 7.0<br>(a)         | <0.0001         |
| Sophisticated | 24.9<br>(b)          | 25.0<br>(b)        | 23.9<br>(b)        | 23.7<br>(b)            | 11.1<br>(a)        | <0.0001         |
| Unique        | 16.8<br>(b)          | 13.7<br>(a)        | 15.5<br>(ab)       | 16.6<br>(b)            | 25.1<br>(c)        | <0.0001         |
| Youthful      | 12.7<br>(c)          | 9.5<br>(ab)        | 11.1<br>(bc)       | 8.7<br>(a)             | 15.0<br>(d)        | <0.0001         |

**S6B. Situational use terms.**

| <b>Terms</b>                                    | <b>PB<br/>Cheese</b> | <b>PB<br/>Fish</b> | <b>PB<br/>Meat</b> | <b>PB<br/>Meat33%</b> | <b>PB<br/>Milk</b> | <b>p-values</b>   |
|-------------------------------------------------|----------------------|--------------------|--------------------|-----------------------|--------------------|-------------------|
| When I want something I like                    | 24.4<br>(b)          | 19.4<br>(a)        | 19.4<br>(a)        | 20.1<br>(a)           | 23.7<br>(b)        | <b>&lt;0.0001</b> |
| When I feel like trying something new           | 44.5<br>(b)          | 45.7<br>(b)        | 43.3<br>(b)        | 44.7<br>(b)           | 38.5<br>(a)        | <b>&lt;0.0001</b> |
| To move my diet in a more sustainable direction | 36.9<br>(ab)         | 37.0<br>(ab)       | 39.6<br>(b)        | 38.1<br>(ab)          | 36.5<br>(a)        | <b>0.023</b>      |
| When I want something healthy                   | 32.6<br>(b)          | 29.0<br>(a)        | 33.3<br>(bc)       | 31.6<br>(ab)          | 36.3<br>(c)        | <b>&lt;0.0001</b> |
| As part of meals that I post on social media    | 12.6<br>(a)          | 12.4<br>(a)        | 12.6<br>(a)        | 11.6<br>(a)           | 11.2<br>(a)        | 0.177             |
| To set a good example to those around me        | 19.8<br>(a)          | 18.6<br>(a)        | 22.5<br>(b)        | 19.9<br>(a)           | 20.7<br>(ab)       | <b>0.000</b>      |
| As a regular part of my diet                    | 22.3<br>(b)          | 18.0<br>(a)        | 22.1<br>(b)        | 20.4<br>(ab)          | 31.1<br>(c)        | <b>&lt;0.0001</b> |
| As part of easy and convenient meals            | 23.6<br>(b)          | 19.5<br>(a)        | 23.3<br>(b)        | 22.7<br>(b)           | 23.9<br>(b)        | <b>&lt;0.0001</b> |



**PART S7.** Results for aggregate sample to supplement, respectively, Figure 2a and Figure 3a, showing average stimuli positions with 95% confidence ellipses following Correspondence Analysis. A) Emotional and conceptual stimuli associations; B) Situational use stimuli associations.

**(A)**

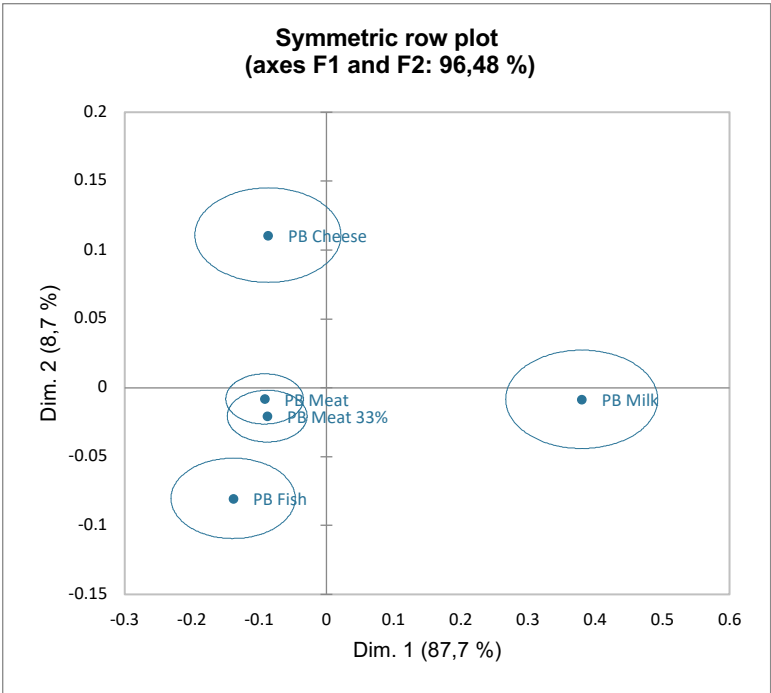

**(B)**

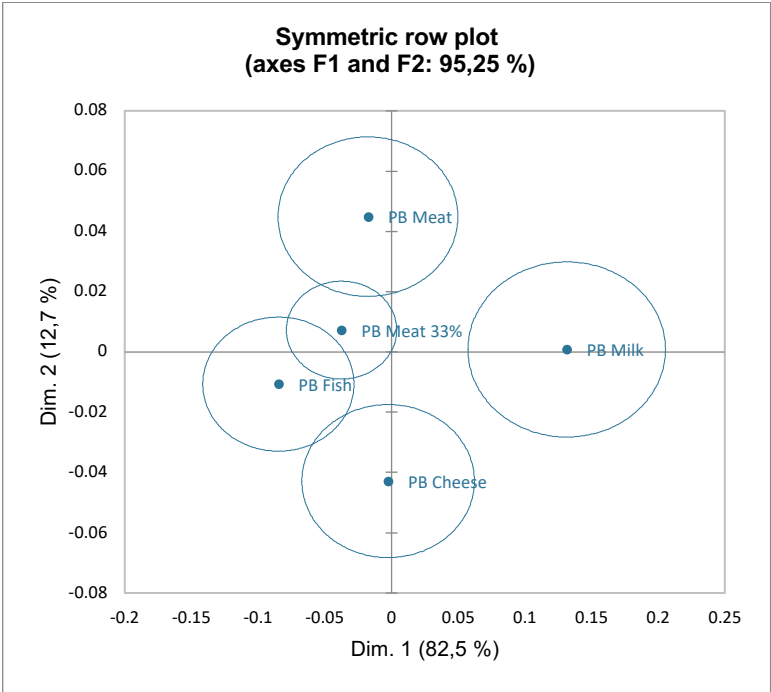

**PART S8.** Results following hierarchical cluster analysis on Willingness to Consume (WTC) ratings for aggregate sample. A) Dendrogram for 7-cluster solution; B) Mean WTC ratings (1='Never or less than once yearly', 5 = '1-3 times per month', 9 = 'Once daily or more') by cluster for PB food categories (standard errors between 0.1 and 0.2 for all clusters and all PB food categories).

(A)

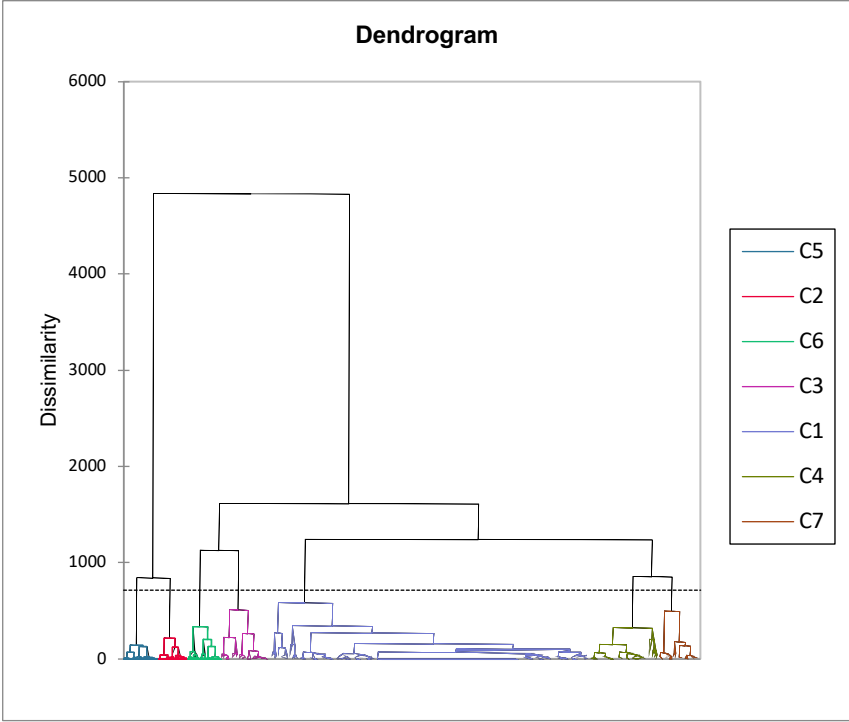

(B)

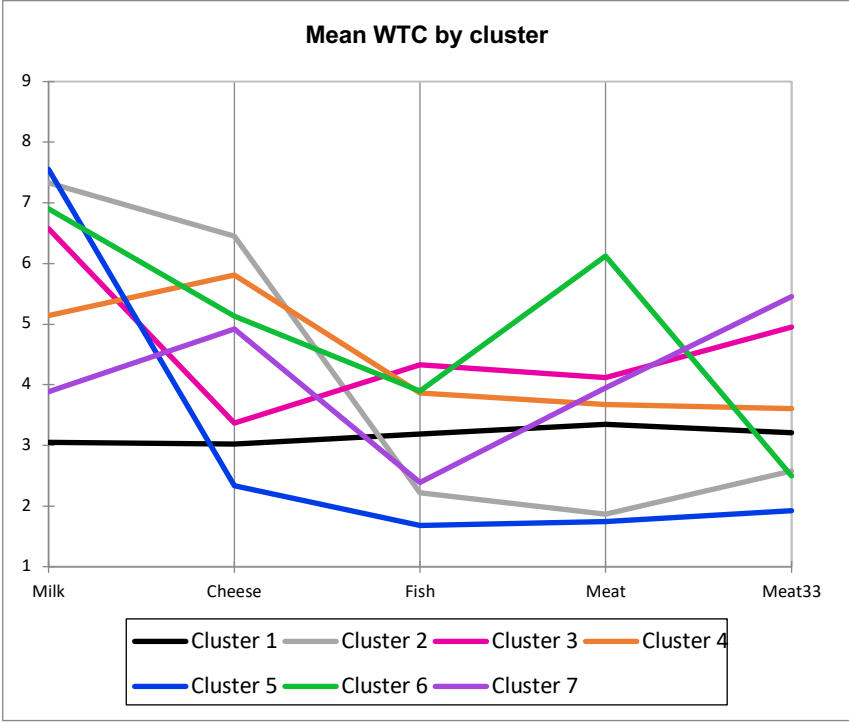

**PART S9.** Results following hierarchical cluster analysis on Willingness to Consume (WTC) ratings for Cluster 1. A) Dendrogram for 3-cluster solution; B) Mean WTC ratings (1='Never or less than once yearly', 5 = '1-3 times per month', 9 = 'Once daily or more') by cluster for PB food categories (standard errors between 0.1 and 0.2 for all clusters and all PB food categories). The number of consumers in each cluster were: C1=G1=203, C2=G2=865, and C3=G2=314.

(A)

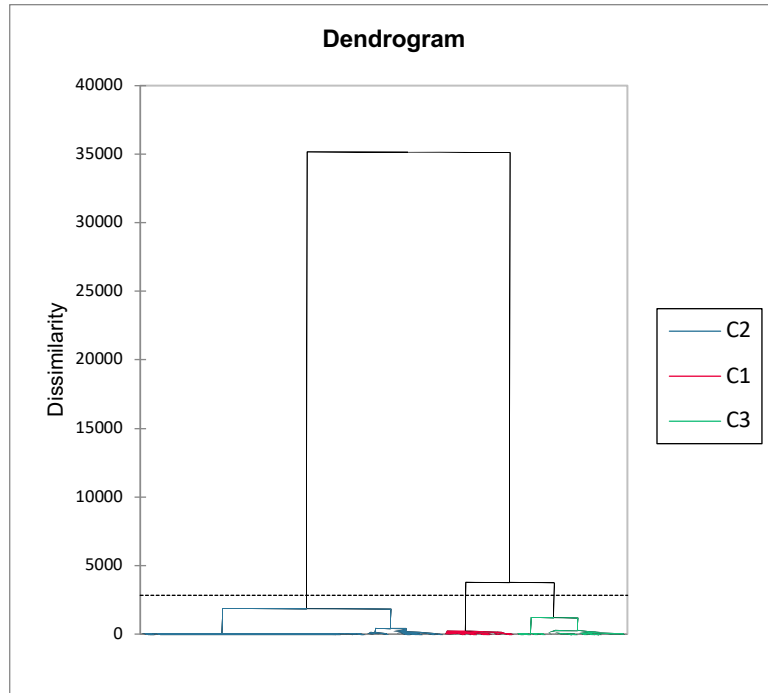

(B)

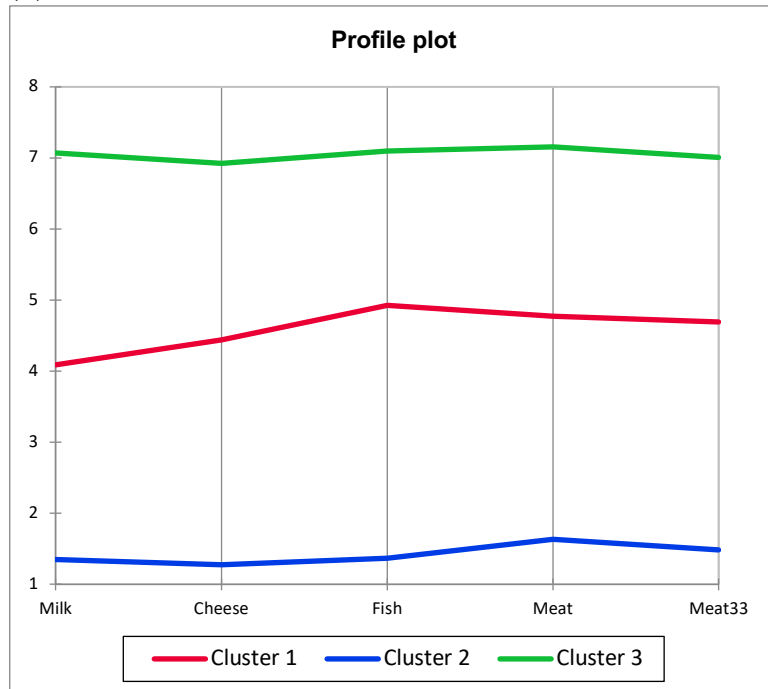

**PART S10.** Participant characteristics for the three sub-groups in the non-category discriminating cluster (C1) based on willingness to consume (WTC) for plant-based (PB) food categories.

|                                            | <b>Group 1</b>    | <b>Group 2</b> | <b>Group 3</b>  |
|--------------------------------------------|-------------------|----------------|-----------------|
|                                            | N=203             | N=865          | N=314           |
|                                            | “medium” avg. WTC | “low” avg. WTC | “high” avg. WTC |
| <b>Country (%)</b>                         |                   |                |                 |
| Australia                                  | 19.2              | 35.2           | 12.4            |
| India                                      | 18.7              | 8.9            | 39.2            |
| Singapore                                  | 39.4              | 26.8           | 25.2            |
| United States                              | 22.7              | 29.1           | 22.9            |
| <b>Biological sex (%)</b>                  |                   |                |                 |
| Female                                     | 42.9              | 50.6           | 49.0            |
| Male                                       | 57.1              | 49.4           | 51.0            |
| <b>Age group (%)</b>                       |                   |                |                 |
| Younger (18-45 y.o.)                       | 55.2              | 39.7           | 65.3            |
| Older (46-69 y.o.)                         | 44.8              | 60.4           | 34.7            |
| <b>Education (%)</b>                       |                   |                |                 |
| High school, vocational or short graduate  | 37.4              | 46.5           | 29.3            |
| University education (Bachelor or higher)  | 62.1              | 53.0           | 70.7            |
| Prefer to not answer                       | 0.5               | 0.5            | 0.0             |
| <b>Dietary preferences (%)</b>             |                   |                |                 |
| Flexitarian                                | 37.9              | 23.8           | 38.2            |
| Omnivore                                   | 58.1              | 73.4           | 59.6            |
| Vegetarian                                 | 4.0               | 2.8            | 2.2             |
| <b>Food Neophobia [M (SD)]</b>             | 36.3<br>(8.6)     | 38.4<br>(11.4) | 35.4<br>(8.8)   |
| <b>Food Technology Neophobia [M (SD)]</b>  | 53.5<br>(7.7)     | 60.2<br>(12.0) | 52.8<br>(11.9)  |
| <b>Pro-Environmental Attitude [M (SD)]</b> | 61.1<br>(10.3)    | 59.5<br>(14.1) | 63.1<br>(9.5)   |

**PART S11.** Mean willingness to consume (WTC) ratings (1=‘Never or less than once yearly’, 5 = ‘1-3 times per month’, 9 = ‘Once daily or more’) by plant-based (PB) food category for the 6 PB discriminating clusters (n=1112; 44.6% of total sample) (standard errors between 0.1 and 0.2 for all clusters and all PB food categories). The last two rows show p-value and effect size ( $\eta^2$ ) following analysis of variance within PB food categories. Results from Tukey’s post-hoc tests shown (within columns, clusters with same letters are not significant at the 5% level of significance).

| Cluster (N) | PB Milk | PB Cheese | PB Fish | PB Meat | PB Meat 33% |
|-------------|---------|-----------|---------|---------|-------------|
| 2 (127)     | 7.3 A   | 6.4 A     | 2.2 BC  | 1.9 C   | 2.6 C       |
| 3 (214)     | 6.6 B   | 3.4 D     | 4.3 A   | 4.1 B   | 4.9 A       |
| 4 (296)     | 5.1 C   | 5.8 B     | 3.9 A   | 3.7 B   | 3.6 B       |
| 5 (150)     | 7.6 A   | 2.3 E     | 1.7 C   | 1.7 C   | 1.9 C       |
| 6 (143)     | 6.9 AB  | 5.1 C     | 3.9 A   | 6.1 A   | 2.5 C       |
| 7 (182)     | 3.9 D   | 4.9 C     | 2.4 B   | 3.9 B   | 5.5 A       |
| P-value     | <0.0001 | <0.0001   | <0.0001 | <0.0001 | <0.0001     |
| Effect size | .34     | .22       | .07     | .12     | .12         |

**PART S12.** Citation frequency (%) for emotional and conceptual CATA terms. Results from Cochran Q test (final column) and post-hoc comparisons (Sheskin) by cluster (Cluster 2 to Cluster 7) for the five plant-based products in the study.

**S12A. CLUSTER 2.**

| <b>Term</b>   | <b>PB<br/>Cheese</b> | <b>PB<br/>Fish</b> | <b>PB<br/>Meat</b> | <b>PB<br/>Meat 33%</b> | <b>PB<br/>Milk</b> | <b>p-value</b>    |
|---------------|----------------------|--------------------|--------------------|------------------------|--------------------|-------------------|
| Adventurous   | 16.5<br>(a)          | 14.2<br>(a)        | 17.3<br>(a)        | 18.9<br>(a)            | 16.5<br>(a)        | 0.860             |
| Boring        | 3.9<br>(a)           | 5.5<br>(a)         | 7.1<br>(a)         | 3.9<br>(a)             | 1.6<br>(a)         | 0.186             |
| Classy        | 5.5<br>(a)           | 8.7<br>(a)         | 10.2<br>(a)        | 7.9<br>(a)             | 10.2<br>(a)        | 0.486             |
| Comforting    | 15.7<br>(ab)         | 7.9<br>(a)         | 12.6<br>(ab)       | 10.2<br>(a)            | 22.8<br>(b)        | <b>0.002</b>      |
| Dissatisfied  | 7.9<br>(a)           | 10.2<br>(a)        | 12.6<br>(a)        | 9.4<br>(a)             | 7.1<br>(a)         | 0.434             |
| Easygoing     | 9.4<br>(a)           | 7.1<br>(a)         | 8.7<br>(a)         | 7.9<br>(a)             | 12.6<br>(a)        | 0.449             |
| Energetic     | 4.7<br>(a)           | 3.9<br>(a)         | 4.7<br>(a)         | 2.4<br>(a)             | 15.7<br>(b)        | <b>&lt;0.0001</b> |
| Enthusiastic  | 16.5<br>(a)          | 11.0<br>(a)        | 15.7<br>(a)        | 16.5<br>(a)            | 15.0<br>(a)        | 0.638             |
| Feminine      | 17.3<br>(b)          | 10.2<br>(ab)       | 15.0<br>(b)        | 13.4<br>(ab)           | 3.9<br>(a)         | <b>0.002</b>      |
| Happy         | 26.0<br>(a)          | 26.8<br>(a)        | 25.2<br>(a)        | 24.4<br>(a)            | 32.3<br>(a)        | 0.508             |
| Inspiring     | 11.0<br>(a)          | 12.6<br>(a)        | 11.8<br>(a)        | 10.2<br>(a)            | 26.8<br>(b)        | <b>0.0002</b>     |
| Nervous       | 9.4<br>(a)           | 11.0<br>(a)        | 6.3<br>(a)         | 9.4<br>(a)             | 3.1<br>(a)         | 0.064             |
| Passive       | 9.4<br>(a)           | 9.4<br>(a)         | 8.7<br>(a)         | 10.2<br>(a)            | 8.7<br>(a)         | 0.987             |
| Powerful      | 3.9<br>(a)           | 10.2<br>(ab)       | 8.7<br>(ab)        | 8.7<br>(ab)            | 14.2<br>(b)        | 0.064             |
| Pretentious   | 9.4<br>(ab)          | 16.5<br>(b)        | 18.1<br>(b)        | 12.6<br>(b)            | 1.6<br>(a)         | <b>&lt;0.0001</b> |
| Sophisticated | 22.0<br>(a)          | 26.8<br>(a)        | 25.2<br>(a)        | 26.0<br>(a)            | 13.4<br>(a)        | <b>0.033</b>      |
| Tense         | 6.3<br>(a)           | 7.1<br>(a)         | 9.4<br>(a)         | 5.5<br>(a)             | 2.4<br>(a)         | 0.166             |
| Uninspired    | 12.6<br>(a)          | 10.2<br>(a)        | 11.0<br>(a)        | 7.1<br>(a)             | 4.7<br>(a)         | 0.116             |
| Unique        | 10.2<br>(a)          | 10.2<br>(a)        | 13.4<br>(ab)       | 15.0<br>(ab)           | 22.0<br>(b)        | <b>0.026</b>      |
| Youthful      | 8.7<br>(a)           | 8.7<br>(a)         | 11.8<br>(a)        | 6.3<br>(a)             | 13.4<br>(a)        | 0.208             |

**S12B. CLUSTER 3.**

| <b>Term</b>   | <b>PB<br/>Cheese</b> | <b>PB<br/>Fish</b> | <b>PB<br/>Meat</b> | <b>PB<br/>Meat 33%</b> | <b>PB<br/>Milk</b> | <b>p-value</b>    |
|---------------|----------------------|--------------------|--------------------|------------------------|--------------------|-------------------|
| Adventurous   | 22.0<br>(a)          | 21.0<br>(a)        | 20.6<br>(a)        | 22.0<br>(a)            | 17.3<br>(a)        | 0.659             |
| Boring        | 8.4<br>(a)           | 7.5<br>(a)         | 7.5<br>(a)         | 6.1<br>(a)             | 5.1<br>(a)         | 0.564             |
| Classy        | 13.6<br>(a)          | 8.9<br>(a)         | 11.2<br>(a)        | 8.4<br>(a)             | 8.4<br>(a)         | 0.169             |
| Comforting    | 14.5<br>(ab)         | 7.5<br>(a)         | 12.1<br>(a)        | 9.3<br>(a)             | 20.6<br>(b)        | <b>&lt;0.0001</b> |
| Dissatisfied  | 12.6<br>(b)          | 11.2<br>(ab)       | 11.2<br>(ab)       | 10.3<br>(ab)           | 5.1<br>(a)         | <b>0.042</b>      |
| Easygoing     | 15.4<br>(a)          | 12.1<br>(a)        | 14.0<br>(a)        | 12.1<br>(a)            | 15.4<br>(a)        | 0.616             |
| Energetic     | 1.4<br>(a)           | 7.0<br>(a)         | 7.0<br>(a)         | 7.5<br>(a)             | 22.9<br>(b)        | <b>&lt;0.0001</b> |
| Enthusiastic  | 14.0<br>(a)          | 15.4<br>(a)        | 17.8<br>(a)        | 16.8<br>(a)            | 15.9<br>(a)        | 0.791             |
| Feminine      | 17.8<br>(b)          | 14.0<br>(b)        | 15.0<br>(b)        | 13.1<br>(b)            | 2.8<br>(a)         | <b>&lt;0.0001</b> |
| Happy         | 22.9<br>(a)          | 20.1<br>(a)        | 26.2<br>(a)        | 28.0<br>(a)            | 29.0<br>(a)        | 0.086             |
| Inspiring     | 15.4<br>(a)          | 15.4<br>(a)        | 19.6<br>(ab)       | 20.6<br>(ab)           | 26.6<br>(b)        | <b>0.004</b>      |
| Nervous       | 7.5<br>(a)           | 9.8<br>(a)         | 7.9<br>(a)         | 7.0<br>(a)             | 4.2<br>(a)         | 0.152             |
| Passive       | 8.4<br>(a)           | 7.9<br>(a)         | 8.4<br>(a)         | 8.9<br>(a)             | 7.9<br>(a)         | 0.993             |
| Powerful      | 11.7<br>(ab)         | 10.7<br>(a)        | 8.4<br>(a)         | 5.1<br>(a)             | 18.7<br>(b)        | <b>&lt;0.0001</b> |
| Pretentious   | 14.0<br>(a)          | 10.3<br>(a)        | 9.8<br>(a)         | 11.7<br>(a)            | 7.5<br>(a)         | 0.135             |
| Sophisticated | 25.2<br>(b)          | 22.0<br>(ab)       | 29.9<br>(b)        | 23.8<br>(ab)           | 14.0<br>(a)        | <b>0.0003</b>     |
| Tense         | 6.1<br>(a)           | 3.7<br>(a)         | 7.0<br>(a)         | 3.7<br>(a)             | 7.9<br>(a)         | 0.108             |
| Uninspired    | 12.1<br>(a)          | 13.6<br>(a)        | 9.3<br>(a)         | 10.3<br>(a)            | 8.9<br>(a)         | 0.368             |
| Unique        | 16.4<br>(a)          | 16.4<br>(a)        | 17.3<br>(a)        | 26.2<br>(ab)           | 31.3<br>(b)        | <b>&lt;0.0001</b> |
| Youthful      | 8.4<br>(a)           | 7.0<br>(a)         | 9.3<br>(a)         | 10.7<br>(ab)           | 17.3<br>(b)        | <b>0.0002</b>     |

**S12C. CLUSTER 4.**

| <b>Term</b>   | <b>PB<br/>Cheese</b> | <b>PB<br/>Fish</b> | <b>PB<br/>Meat</b> | <b>PB<br/>Meat 33%</b> | <b>PB<br/>Milk</b> | <b>p-value</b>    |
|---------------|----------------------|--------------------|--------------------|------------------------|--------------------|-------------------|
| Adventurous   | 16.6<br>(a)          | 21.6<br>(a)        | 19.6<br>(a)        | 22.6<br>(a)            | 18.2<br>(a)        | 0.236             |
| Boring        | 5.4<br>(a)           | 7.8<br>(a)         | 8.8<br>(a)         | 5.7<br>(a)             | 7.4<br>(a)         | 0.321             |
| Classy        | 13.2<br>(a)          | 8.8<br>(a)         | 8.1<br>(a)         | 8.4<br>(a)             | 13.2<br>(a)        | <b>0.025</b>      |
| Comforting    | 15.9<br>(bc)         | 8.1<br>(a)         | 8.8<br>(ab)        | 11.1<br>(ab)           | 23.0<br>(c)        | <b>&lt;0.0001</b> |
| Dissatisfied  | 6.8<br>(a)           | 12.8<br>(b)        | 7.8<br>(ab)        | 8.1<br>(ab)            | 8.4<br>(ab)        | <b>0.023</b>      |
| Easygoing     | 15.9<br>(ab)         | 13.9<br>(ab)       | 13.2<br>(ab)       | 10.8<br>(a)            | 18.9<br>(b)        | <b>0.022</b>      |
| Energetic     | 4.4<br>(a)           | 5.4<br>(a)         | 4.7<br>(a)         | 2.4<br>(a)             | 18.2<br>(b)        | <b>&lt;0.0001</b> |
| Enthusiastic  | 23.3<br>(a)          | 18.2<br>(a)        | 19.6<br>(a)        | 19.6<br>(a)            | 16.9<br>(a)        | 0.255             |
| Feminine      | 18.9<br>(b)          | 16.2<br>(b)        | 15.2<br>(b)        | 14.9<br>(b)            | 6.4<br>(a)         | <b>&lt;0.0001</b> |
| Happy         | 28.7<br>(a)          | 21.3<br>(a)        | 27.7<br>(a)        | 22.6<br>(a)            | 26.0<br>(a)        | 0.073             |
| Inspiring     | 19.3<br>(a)          | 18.2<br>(a)        | 15.5<br>(a)        | 15.5<br>(a)            | 23.3<br>(a)        | <b>0.034</b>      |
| Nervous       | 5.4<br>(ab)          | 10.5<br>(b)        | 10.1<br>(ab)       | 9.1<br>(ab)            | 4.7<br>(a)         | <b>0.003</b>      |
| Passive       | 7.8<br>(a)           | 8.8<br>(a)         | 9.8<br>(a)         | 9.8<br>(a)             | 8.4<br>(a)         | 0.858             |
| Powerful      | 8.1<br>(a)           | 9.5<br>(a)         | 9.1<br>(a)         | 8.4<br>(a)             | 18.2<br>(b)        | <b>&lt;0.0001</b> |
| Pretentious   | 11.5<br>(ab)         | 15.2<br>(b)        | 11.1<br>(ab)       | 10.1<br>(ab)           | 8.1<br>(a)         | <b>0.045</b>      |
| Sophisticated | 29.4<br>(b)          | 30.4<br>(b)        | 31.4<br>(b)        | 31.1<br>(b)            | 12.5<br>(a)        | <b>&lt;0.0001</b> |
| Tense         | 3.4<br>(a)           | 7.1<br>(ab)        | 6.4<br>(ab)        | 8.4<br>(b)             | 5.1<br>(ab)        | 0.051             |
| Uninspired    | 6.4<br>(a)           | 11.1<br>(a)        | 8.8<br>(a)         | 8.8<br>(a)             | 6.8<br>(a)         | 0.136             |
| Unique        | 21.3<br>(ab)         | 17.6<br>(ab)       | 17.2<br>(a)        | 16.6<br>(a)            | 25.7<br>(b)        | <b>0.010</b>      |
| Youthful      | 15.9<br>(bc)         | 10.5<br>(ab)       | 12.8<br>(abc)      | 7.8<br>(a)             | 17.2<br>(c)        | <b>0.0001</b>     |



**S12D. CLUSTER 5.**

| <b>Term</b>   | <b>PB<br/>Cheese</b> | <b>PB<br/>Fish</b> | <b>PB<br/>Meat</b> | <b>PB<br/>Meat 33%</b> | <b>PB<br/>Milk</b> | <b>p-value</b>    |
|---------------|----------------------|--------------------|--------------------|------------------------|--------------------|-------------------|
| Adventurous   | 14.0<br>(a)          | 11.3<br>(a)        | 17.3<br>(a)        | 14.0<br>(a)            | 14.0<br>(a)        | 0.593             |
| Boring        | 15.3<br>(b)          | 12.7<br>(ab)       | 12.0<br>(ab)       | 9.3<br>(ab)            | 4.7<br>(a)         | <b>0.012</b>      |
| Classy        | 8.0<br>(a)           | 7.3<br>(a)         | 8.7<br>(a)         | 6.0<br>(a)             | 6.7<br>(a)         | 0.864             |
| Comforting    | 8.7<br>(a)           | 6.0<br>(a)         | 6.0<br>(a)         | 8.7<br>(a)             | 22.0<br>(b)        | <b>&lt;0.0001</b> |
| Dissatisfied  | 16.7<br>(b)          | 22.7<br>(b)        | 18.0<br>(b)        | 14.7<br>(ab)           | 6.0<br>(a)         | <b>0.0001</b>     |
| Easygoing     | 9.3<br>(a)           | 10.7<br>(a)        | 11.3<br>(a)        | 8.7<br>(a)             | 23.3<br>(b)        | <b>&lt;0.0001</b> |
| Energetic     | 2.7<br>(a)           | 2.7<br>(a)         | 4.7<br>(a)         | 6.0<br>(a)             | 13.3<br>(b)        | <b>&lt;0.0001</b> |
| Enthusiastic  | 16.7<br>(a)          | 10.7<br>(a)        | 14.0<br>(a)        | 13.3<br>(a)            | 18.0<br>(a)        | 0.309             |
| Feminine      | 13.3<br>(b)          | 9.3<br>(ab)        | 10.7<br>(b)        | 12.0<br>(b)            | 2.7<br>(a)         | <b>0.001</b>      |
| Happy         | 15.3<br>(a)          | 14.0<br>(a)        | 19.3<br>(ab)       | 16.0<br>(ab)           | 26.7<br>(b)        | <b>0.009</b>      |
| Inspiring     | 9.3<br>(a)           | 8.0<br>(a)         | 11.3<br>(a)        | 8.7<br>(a)             | 23.3<br>(b)        | <b>&lt;0.0001</b> |
| Nervous       | 11.3<br>(ab)         | 13.3<br>(b)        | 8.0<br>(ab)        | 9.3<br>(ab)            | 3.3<br>(a)         | <b>0.008</b>      |
| Passive       | 5.3<br>(a)           | 6.7<br>(a)         | 5.3<br>(a)         | 12.0<br>(a)            | 5.3<br>(a)         | 0.065             |
| Powerful      | 5.3<br>(a)           | 9.3<br>(ab)        | 8.7<br>(ab)        | 4.7<br>(a)             | 16.7<br>(b)        | <b>0.001</b>      |
| Pretentious   | 10.0<br>(ab)         | 11.3<br>(b)        | 8.7<br>(ab)        | 9.3<br>(ab)            | 3.3<br>(a)         | <b>0.041</b>      |
| Sophisticated | 23.3<br>(b)          | 26.0<br>(b)        | 20.7<br>(ab)       | 24.0<br>(b)            | 10.0<br>(a)        | <b>0.0003</b>     |
| Tense         | 2.7<br>(a)           | 4.7<br>(a)         | 8.0<br>(a)         | 5.3<br>(a)             | 3.3<br>(a)         | 0.146             |
| Uninspired    | 15.3<br>(ab)         | 21.3<br>(b)        | 19.3<br>(b)        | 14.0<br>(ab)           | 6.7<br>(a)         | <b>0.0002</b>     |
| Unique        | 16.0<br>(ab)         | 10.7<br>(a)        | 10.7<br>(a)        | 12.0<br>(a)            | 24.7<br>(b)        | <b>0.0002</b>     |
| Youthful      | 8.7<br>(a)           | 9.3<br>(a)         | 9.3<br>(a)         | 6.0<br>(a)             | 11.3<br>(a)        | 0.307             |

**S12E. CLUSTER 6.**

| <b>Term</b>   | <b>PB<br/>Cheese</b> | <b>PB<br/>Fish</b> | <b>PB<br/>Meat</b> | <b>PB<br/>Meat 33%</b> | <b>PB<br/>Milk</b> | <b>p-value</b>    |
|---------------|----------------------|--------------------|--------------------|------------------------|--------------------|-------------------|
| Adventurous   | 27.3<br>(a)          | 20.3<br>(a)        | 23.1<br>(a)        | 24.5<br>(a)            | 18.9<br>(a)        | 0.314             |
| Boring        | 4.9<br>(a)           | 6.3<br>(a)         | 7.7<br>(a)         | 8.4<br>(a)             | 5.6<br>(a)         | 0.619             |
| Classy        | 15.4<br>(b)          | 10.5<br>(ab)       | 8.4<br>(ab)        | 5.6<br>(a)             | 10.5<br>(ab)       | 0.054             |
| Comforting    | 14.7<br>(a)          | 7.7<br>(a)         | 18.2<br>(ab)       | 8.4<br>(a)             | 27.3<br>(b)        | <b>&lt;0.0001</b> |
| Dissatisfied  | 7.7<br>(ab)          | 15.4<br>(b)        | 9.8<br>(ab)        | 13.3<br>(b)            | 2.8<br>(a)         | <b>0.001</b>      |
| Easygoing     | 16.1<br>(ab)         | 13.3<br>(ab)       | 11.2<br>(ab)       | 9.8<br>(a)             | 21.0<br>(b)        | <b>0.016</b>      |
| Energetic     | 4.9<br>(a)           | 4.9<br>(a)         | 8.4<br>(a)         | 4.9<br>(a)             | 23.1<br>(b)        | <b>&lt;0.0001</b> |
| Enthusiastic  | 23.8<br>(b)          | 18.2<br>(ab)       | 19.6<br>(ab)       | 9.1<br>(a)             | 22.4<br>(b)        | <b>0.008</b>      |
| Feminine      | 14.7<br>(b)          | 9.8<br>(ab)        | 17.5<br>(b)        | 9.8<br>(ab)            | 4.9<br>(a)         | <b>0.002</b>      |
| Happy         | 28.0<br>(b)          | 18.2<br>(ab)       | 30.1<br>(b)        | 15.4<br>(a)            | 27.3<br>(ab)       | <b>0.001</b>      |
| Inspiring     | 22.4<br>(ab)         | 13.3<br>(a)        | 20.3<br>(ab)       | 14.7<br>(a)            | 26.6<br>(b)        | <b>0.008</b>      |
| Nervous       | 8.4<br>(ab)          | 10.5<br>(b)        | 7.7<br>(ab)        | 11.2<br>(b)            | 1.4<br>(a)         | <b>0.006</b>      |
| Passive       | 7.0<br>(a)           | 4.9<br>(a)         | 7.7<br>(a)         | 9.1<br>(a)             | 12.6<br>(a)        | 0.100             |
| Powerful      | 7.0<br>(a)           | 11.2<br>(ab)       | 16.1<br>(ab)       | 11.2<br>(ab)           | 21.7<br>(b)        | <b>0.001</b>      |
| Pretentious   | 11.2<br>(a)          | 10.5<br>(a)        | 6.3<br>(a)         | 9.1<br>(a)             | 5.6<br>(a)         | 0.233             |
| Sophisticated | 28.0<br>(b)          | 23.1<br>(b)        | 21.7<br>(ab)       | 19.6<br>(ab)           | 11.2<br>(a)        | <b>0.002</b>      |
| Tense         | 2.1<br>(a)           | 2.8<br>(a)         | 4.9<br>(a)         | 2.8<br>(a)             | 2.1<br>(a)         | 0.497             |
| Uninspired    | 7.7<br>(a)           | 8.4<br>(a)         | 4.9<br>(a)         | 11.2<br>(a)            | 5.6<br>(a)         | 0.211             |
| Unique        | 25.9<br>(a)          | 16.1<br>(a)        | 21.7<br>(a)        | 18.2<br>(a)            | 28.0<br>(a)        | <b>0.030</b>      |
| Youthful      | 14.7<br>(a)          | 9.1<br>(a)         | 11.2<br>(a)        | 9.1<br>(a)             | 13.3<br>(a)        | 0.329             |

**S12F. CLUSTER 7.**

| <b>Term</b>   | <b>PB<br/>Cheese</b> | <b>PB<br/>Fish</b> | <b>PB<br/>Meat</b> | <b>PB<br/>Meat 33%</b> | <b>PB<br/>Milk</b> | <b>p-value</b>    |
|---------------|----------------------|--------------------|--------------------|------------------------|--------------------|-------------------|
| Adventurous   | 23.1<br>(ab)         | 21.4<br>(ab)       | 22.0<br>(ab)       | 28.0<br>(b)            | 16.5<br>(a)        | 0.054             |
| Boring        | 6.6<br>(a)           | 11.0<br>(a)        | 11.0<br>(a)        | 8.8<br>(a)             | 11.0<br>(a)        | 0.393             |
| Classy        | 13.2<br>(a)          | 7.7<br>(a)         | 8.8<br>(a)         | 6.6<br>(a)             | 8.2<br>(a)         | 0.142             |
| Comforting    | 12.6<br>(a)          | 13.2<br>(a)        | 11.0<br>(a)        | 13.7<br>(a)            | 16.5<br>(a)        | 0.571             |
| Dissatisfied  | 12.1<br>(ab)         | 17.0<br>(b)        | 14.8<br>(ab)       | 6.6<br>(a)             | 12.6<br>(ab)       | 0.008             |
| Easygoing     | 12.6<br>(a)          | 10.4<br>(a)        | 13.7<br>(a)        | 12.1<br>(a)            | 15.4<br>(a)        | 0.575             |
| Energetic     | 3.8<br>(a)           | 7.7<br>(ab)        | 6.0<br>(a)         | 4.4<br>(a)             | 13.7<br>(b)        | <b>0.0003</b>     |
| Enthusiastic  | 15.4<br>(a)          | 8.8<br>(a)         | 12.6<br>(a)        | 12.6<br>(a)            | 15.4<br>(a)        | 0.221             |
| Feminine      | 16.5<br>(b)          | 6.6<br>(a)         | 10.4<br>(ab)       | 9.9<br>(ab)            | 3.8<br>(a)         | <b>&lt;0.0001</b> |
| Happy         | 20.9<br>(a)          | 17.0<br>(a)        | 18.1<br>(a)        | 23.6<br>(a)            | 18.1<br>(a)        | 0.366             |
| Inspiring     | 15.4<br>(ab)         | 10.4<br>(a)        | 15.4<br>(ab)       | 23.6<br>(b)            | 19.8<br>(ab)       | <b>0.002</b>      |
| Nervous       | 6.6<br>(a)           | 14.8<br>(b)        | 12.6<br>(ab)       | 7.1<br>(a)             | 10.4<br>(ab)       | <b>0.010</b>      |
| Passive       | 10.4<br>(a)          | 7.7<br>(a)         | 8.2<br>(a)         | 4.9<br>(a)             | 7.1<br>(a)         | 0.247             |
| Powerful      | 12.1<br>(a)          | 14.3<br>(a)        | 12.1<br>(a)        | 10.4<br>(a)            | 13.2<br>(a)        | 0.779             |
| Pretentious   | 10.4<br>(a)          | 8.8<br>(a)         | 11.0<br>(a)        | 9.3<br>(a)             | 6.6<br>(a)         | 0.532             |
| Sophisticated | 22.5<br>(b)          | 26.4<br>(b)        | 24.7<br>(b)        | 25.3<br>(b)            | 11.5<br>(a)        | <b>&lt;0.0001</b> |
| Tense         | 5.5<br>(a)           | 5.5<br>(a)         | 8.8<br>(a)         | 3.3<br>(a)             | 3.8<br>(a)         | 0.084             |
| Uninspired    | 13.2<br>(b)          | 15.4<br>(b)        | 14.8<br>(b)        | 4.4<br>(a)             | 14.3<br>(b)        | <b>0.001</b>      |
| Unique        | 20.3<br>(a)          | 18.7<br>(a)        | 17.0<br>(a)        | 23.1<br>(ab)           | 32.4<br>(b)        | <b>0.001</b>      |
| Youthful      | 8.8<br>(a)           | 6.6<br>(a)         | 12.6<br>(a)        | 7.7<br>(a)             | 8.2<br>(a)         | 0.155             |

**PART S13.** Citation frequency (%) for situational use CATA terms. Results from Cochran Q test (final column) and post-hoc comparisons (Sheskin) by cluster (Cluster 2 to Cluster 7) for the five plant-based products in the study.

**S13A. CLUSTER 2.**

| <b>Term</b>                                     | <b>Cheese</b> | <b>Fish</b>  | <b>Meat</b>  | <b>Meat33</b> | <b>Milk</b>  | <b>p-value</b> |
|-------------------------------------------------|---------------|--------------|--------------|---------------|--------------|----------------|
| When I want something I like                    | 26.8<br>(a)   | 22.0<br>(a)  | 23.6<br>(a)  | 20.5<br>(a)   | 23.6<br>(a)  | 0.686          |
| When I feel like trying something new           | 45.7<br>(a)   | 48.8<br>(a)  | 48.8<br>(a)  | 49.6<br>(a)   | 40.2<br>(a)  | 0.374          |
| To move my diet in a more sustainable direction | 39.4<br>(a)   | 37.8<br>(a)  | 43.3<br>(a)  | 42.5<br>(a)   | 34.6<br>(a)  | 0.419          |
| When I want something healthy                   | 33.1<br>(a)   | 28.3<br>(a)  | 33.9<br>(a)  | 31.5<br>(a)   | 40.2<br>(a)  | 0.181          |
| As part of meals that I post on social media    | 11.8<br>(a)   | 10.2<br>(a)  | 11.8<br>(a)  | 13.4<br>(a)   | 11.0<br>(a)  | 0.877          |
| To set a good example to those around me        | 12.6<br>(a)   | 14.2<br>(ab) | 21.3<br>(ab) | 24.4<br>(b)   | 19.7<br>(ab) | <b>0.014</b>   |
| As a regular part of my diet                    | 19.7<br>(a)   | 13.4<br>(a)  | 18.1<br>(a)  | 22.0<br>(ab)  | 33.1<br>(b)  | <b>0.0002</b>  |
| As part of easy and convenient meals            | 22.8<br>(a)   | 21.3<br>(a)  | 18.9<br>(a)  | 23.6<br>(a)   | 24.4<br>(a)  | 0.716          |

**S13B. CLUSTER 3.**

| <b>Term</b>                                     | <b>Cheese</b> | <b>Fish</b> | <b>Meat</b> | <b>Meat33</b> | <b>Milk</b> | <b>p-value</b>    |
|-------------------------------------------------|---------------|-------------|-------------|---------------|-------------|-------------------|
| When I want something I like                    | 26.2<br>(a)   | 22.4<br>(a) | 21.0<br>(a) | 25.2<br>(a)   | 22.0<br>(a) | 0.511             |
| When I feel like trying something new           | 44.4<br>(a)   | 44.9<br>(a) | 43.5<br>(a) | 46.3<br>(a)   | 35.0<br>(a) | 0.053             |
| To move my diet in a more sustainable direction | 37.9<br>(a)   | 41.1<br>(a) | 46.7<br>(a) | 46.3<br>(a)   | 38.8<br>(a) | <b>0.032</b>      |
| When I want something healthy                   | 31.8<br>(a)   | 33.2<br>(a) | 40.2<br>(a) | 38.3<br>(a)   | 40.7<br>(a) | 0.069             |
| As part of meals that I post on social media    | 11.7<br>(a)   | 11.7<br>(a) | 10.7<br>(a) | 9.3<br>(a)    | 11.2<br>(a) | 0.854             |
| To set a good example to those around me        | 16.4<br>(a)   | 16.4<br>(a) | 24.8<br>(a) | 18.7<br>(a)   | 20.6<br>(a) | <b>0.029</b>      |
| As a regular part of my diet                    | 22.4<br>(a)   | 19.6<br>(a) | 24.8<br>(a) | 29.9<br>(ab)  | 37.9<br>(b) | <b>&lt;0.0001</b> |
| As part of easy and convenient meals            | 21.5<br>(a)   | 17.3<br>(a) | 21.0<br>(a) | 22.9<br>(a)   | 24.3<br>(a) | 0.320             |

**S13C. CLUSTER 4.**

| <b>Term</b>                                     | <b>Cheese</b> | <b>Fish</b> | <b>Meat</b>  | <b>Meat33</b> | <b>Milk</b>  | <b>p-value</b>    |
|-------------------------------------------------|---------------|-------------|--------------|---------------|--------------|-------------------|
| When I want something I like                    | 29.7<br>(b)   | 18.2<br>(a) | 21.6<br>(ab) | 23.0<br>(ab)  | 25.7<br>(ab) | <b>0.002</b>      |
| When I feel like trying something new           | 41.9<br>(a)   | 45.9<br>(a) | 44.6<br>(a)  | 45.9<br>(a)   | 41.9<br>(a)  | 0.586             |
| To move my diet in a more sustainable direction | 41.6<br>(ab)  | 45.6<br>(b) | 40.5<br>(ab) | 36.8<br>(ab)  | 35.1<br>(a)  | <b>0.010</b>      |
| When I want something healthy                   | 37.5<br>(a)   | 32.1<br>(a) | 34.1<br>(a)  | 38.9<br>(a)   | 38.5<br>(a)  | 0.160             |
| As part of meals that I post on social media    | 13.2<br>(a)   | 12.2<br>(a) | 13.2<br>(a)  | 11.1<br>(a)   | 11.8<br>(a)  | 0.859             |
| To set a good example to those around me        | 23.6<br>(a)   | 23.6<br>(a) | 23.0<br>(a)  | 24.0<br>(a)   | 22.6<br>(a)  | 0.989             |
| As a regular part of my diet                    | 30.1<br>(bc)  | 18.6<br>(a) | 23.0<br>(ab) | 23.0<br>(ab)  | 34.8<br>(c)  | <b>&lt;0.0001</b> |
| As part of easy and convenient meals            | 25.7<br>(ab)  | 22.3<br>(a) | 27.0<br>(ab) | 20.9<br>(a)   | 30.7<br>(b)  | <b>0.009</b>      |

**S13D. CLUSTER 5.**

| <b>Term</b>                                     | <b>Cheese</b> | <b>Fish</b> | <b>Meat</b>  | <b>Meat33</b> | <b>Milk</b> | <b>p-value</b>    |
|-------------------------------------------------|---------------|-------------|--------------|---------------|-------------|-------------------|
| When I want something I like                    | 23.3<br>(ab)  | 16.7<br>(a) | 17.3<br>(a)  | 17.3<br>(a)   | 30.0<br>(b) | <b>0.001</b>      |
| When I feel like trying something new           | 44.7<br>(ab)  | 48.0<br>(b) | 47.3<br>(b)  | 45.3<br>(b)   | 31.3<br>(a) | <b>0.002</b>      |
| To move my diet in a more sustainable direction | 30.7<br>(a)   | 36.0<br>(a) | 41.3<br>(a)  | 38.0<br>(a)   | 31.3<br>(a) | 0.059             |
| When I want something healthy                   | 36.0<br>(ab)  | 24.0<br>(a) | 32.7<br>(ab) | 35.3<br>(ab)  | 39.3<br>(b) | <b>0.014</b>      |
| As part of meals that I post on social media    | 9.3<br>(a)    | 12.7<br>(a) | 14.0<br>(a)  | 10.7<br>(a)   | 10.0<br>(a) | 0.360             |
| To set a good example to those around me        | 16.7<br>(a)   | 14.7<br>(a) | 17.3<br>(a)  | 15.3<br>(a)   | 19.3<br>(a) | 0.692             |
| As a regular part of my diet                    | 16.0<br>(a)   | 12.0<br>(a) | 14.7<br>(a)  | 16.0<br>(a)   | 40.7<br>(b) | <b>&lt;0.0001</b> |
| As part of easy and convenient meals            | 15.3<br>(a)   | 15.3<br>(a) | 19.3<br>(a)  | 22.0<br>(a)   | 25.3<br>(a) | <b>0.024</b>      |

**S13E. CLUSTER 6.**

| <b>Term</b>                                     | <b>Cheese</b> | <b>Fish</b>  | <b>Meat</b>  | <b>Meat33</b> | <b>Milk</b> | <b>p-value</b>    |
|-------------------------------------------------|---------------|--------------|--------------|---------------|-------------|-------------------|
| When I want something I like                    | 28.0<br>(bc)  | 21.7<br>(ab) | 27.3<br>(bc) | 13.3<br>(a)   | 34.3<br>(c) | <b>&lt;0.0001</b> |
| When I feel like trying something new           | 53.1<br>(c)   | 47.6<br>(bc) | 37.1<br>(ab) | 48.3<br>(bc)  | 31.5<br>(a) | <b>0.0001</b>     |
| To move my diet in a more sustainable direction | 43.4<br>(a)   | 45.5<br>(a)  | 48.3<br>(a)  | 39.9<br>(a)   | 40.6<br>(a) | 0.367             |
| When I want something healthy                   | 42.0<br>(ab)  | 32.2<br>(ab) | 42.7<br>(b)  | 28.7<br>(a)   | 44.8<br>(b) | <b>0.002</b>      |
| As part of meals that I post on social media    | 14.0<br>(a)   | 17.5<br>(a)  | 16.8<br>(a)  | 13.3<br>(a)   | 10.5<br>(a) | 0.254             |
| To set a good example to those around me        | 24.5<br>(a)   | 24.5<br>(a)  | 29.4<br>(a)  | 18.9<br>(a)   | 26.6<br>(a) | 0.159             |
| As a regular part of my diet                    | 30.8<br>(ab)  | 23.8<br>(ab) | 36.4<br>(b)  | 17.5<br>(a)   | 53.1<br>(c) | <b>&lt;0.0001</b> |
| As part of easy and convenient meals            | 30.8<br>(a)   | 21.0<br>(a)  | 27.3<br>(a)  | 26.6<br>(a)   | 29.4<br>(a) | 0.187             |



**S13F. CLUSTER 7.**

| <b>Term</b>                                     | <b>Cheese</b> | <b>Fish</b> | <b>Meat</b> | <b>Meat33</b> | <b>Milk</b> | <b>p-value</b> |
|-------------------------------------------------|---------------|-------------|-------------|---------------|-------------|----------------|
| When I want something I like                    | 25.8<br>(a)   | 17.6<br>(a) | 18.1<br>(a) | 19.8<br>(a)   | 19.8<br>(a) | 0.158          |
| When I feel like trying something new           | 44.5<br>(a)   | 47.8<br>(a) | 45.6<br>(a) | 42.9<br>(a)   | 39.6<br>(a) | 0.390          |
| To move my diet in a more sustainable direction | 34.6<br>(a)   | 33.5<br>(a) | 41.2<br>(a) | 42.3<br>(a)   | 43.4<br>(a) | <b>0.026</b>   |
| When I want something healthy                   | 34.6<br>(a)   | 25.8<br>(a) | 36.3<br>(a) | 31.9<br>(a)   | 31.9<br>(a) | 0.113          |
| As part of meals that I post on social media    | 9.9<br>(a)    | 12.1<br>(a) | 10.4<br>(a) | 13.2<br>(a)   | 8.8<br>(a)  | 0.422          |
| To set a good example to those around me        | 23.1<br>(a)   | 18.7<br>(a) | 19.8<br>(a) | 25.3<br>(a)   | 25.8<br>(a) | 0.153          |
| As a regular part of my diet                    | 22.0<br>(a)   | 18.1<br>(a) | 24.2<br>(a) | 23.6<br>(a)   | 28.6<br>(a) | 0.087          |
| As part of easy and convenient meals            | 25.3<br>(a)   | 18.7<br>(a) | 22.5<br>(a) | 24.7<br>(a)   | 23.1<br>(a) | 0.446          |

**References**

1. Dunlap, R.E.; Van Liere, K.D.; Mertig, A.G.; Jones, R.E. New trends in measuring environmental attitudes: measuring endorsement of the new ecological paradigm: a revised NEP scale. *J. Soc. Issues* **2000**, *56*, 425-442.
2. Lounsbury, J.W.; Tornatzky, L.G. A scale for assessing attitudes toward environmental quality. *J. Soc. Psychol.* **1977**, *101*, 299-305.
3. Maloney, M.P.; Ward, M.P.; Braucht, G.N. A revised scale for the measurement of ecological attitudes and knowledge. *Am. Psychol.* **1975**, *30*, 787-790.
4. Goldammer, P.; Annen, H.; Stöckli, P.L.; Jonas, K. Careless responding in questionnaire measures: Detection, impact, and remedies. *Leadersh. Q.* **2020**, *31*, 101384.
5. Schonlau, M.; Toepoel, V. Straightlining in Web survey panels over time. *Surv. Res. Methods* **2015**, *9*, 125-137.
6. Pliner, P.; Hobden, K. Development of a scale to measure the trait of food neophobia in humans. *Appetite* **1992**, *19*, 105-120.
7. Cox, D.; Evans, G. Construction and validation of a psychometric scale to measure consumers' fears of novel food technologies: The food technology neophobia scale. *Food Qual. Prefer.* **2008**, *19*, 704-710.
